# Supplementary material for: Na 2 SnSO 4 F 2 : an ultraviolet-transparent sulfate crystal with large birefringence driven by stereochemically active tin( ii )
Source: Royal Society of Chemistry journal article supplement (doi:10.1039/d5dt02815a), 2026-01-01
Supplement: d5dt02815a1.pdf [file d5dt02815a1.pdf]

## Supporting Information

# **Na<sub>2</sub>SnSO<sub>4</sub>F<sub>2</sub>: An Ultraviolet Transparent Sulfate Crystal with Large Birefringence Driven by Stereochemically Active Tin(II)**

*Jia Wang,<sup>a</sup> Wenbin Zhang,<sup>b,c</sup> Xiangcong Ma,<sup>b,c</sup> Fangfang Zhang,<sup>b,c</sup> Hong Du<sup>\*a,d</sup>, Shujuan Han<sup>\*b,c</sup>*

<sup>a</sup> College of Chemistry and Chemical Engineering, Xinjiang Normal University, Urumqi, 830054, P. R. China.

<sup>b</sup> Center of Materials Science and Optoelectronics Engineering, University of Chinese Academy of Sciences, Beijing 100049, P.R. China.

<sup>c</sup> Research Center for Crystal Materials; CAS Key Laboratory of Functional Materials and Devices for Special Environmental Conditions; Xinjiang Key Laboratory of Functional Crystal Materials; Xinjiang Technical Institute of Physics and Chemistry, Chinese Academy of Sciences, 40-1 South Beijing Road, Urumqi 830011, P. R. China.

<sup>d</sup> Xinjiang Key Laboratory of Energy Storage and Photoelectrocatalytic Materials, Urumqi, 830054, P. R.China.

\*Corresponding author: Hong Du; E-mail: 175790509@qq.com

\*Corresponding author: Shujuan Han; E-mails: hansj@ms.xjb.ac.cn

## EXPERIMENTAL SECTION

### Synthesis

Reagents. Na<sub>2</sub>SO<sub>4</sub> (AR, 99 %) and SnF<sub>2</sub> (AR, 99 %) are commercially available and used without further purification.

Synthesis of Na<sub>2</sub>SnSO<sub>4</sub>F<sub>2</sub>. Using hydrothermal method, Na<sub>2</sub>SO<sub>4</sub> (0.475 g) and SnF<sub>2</sub> (0.525 g) with a stoichiometric ratio of 1:1 were placed in 2 mL of deionized water. After thorough stirring at room temperature, the mixture was sealed in a 23 mL PTFE autoclave. Raise the temperature from room temperature to 220 °C using 240 minutes and hold for 3 days, then cooled down to 190 °C after 1800 minutes, cooled down to 150 °C through 1590 minutes, cooled down to 120 °C after 700 minutes, cooled down to 90 °C after 510 minutes, and finally cooled down to room temperature after 480 minutes. After the experiment, the product was washed with deionized water to obtain colorless and transparent rod-shaped crystals (Figures S1a, S1b).

### Structural Determination.

Crystal data for Na<sub>2</sub>SnSO<sub>4</sub>F<sub>2</sub> were collected using a Bruker SMART APEX II CCD

diffractometer under Mo K $\alpha$  radiation ( $\lambda = 0.71073 \text{ \AA}$ ). The SAINT-Plus and SADABS programs were used for the collection and integration of diffraction data, as well as for the indexing of reflections or digital absorption corrections, respectively. Crystal structure data were parsed and refined using the SHELX and Olex software packages, and atomic coordinates and anisotropic displacement parameters were refined using full-matrix least squares.<sup>1</sup> The PLATON program is used to verify that the crystal structure has no higher symmetric space group.<sup>2</sup> Validation report for CheckCIF confirms that the structure of Na<sub>2</sub>SnSO<sub>4</sub>F<sub>2</sub> is reasonable.

### **Powder X-ray Diffraction**

The purity of Na<sub>2</sub>SnSO<sub>4</sub>F<sub>2</sub> was confirmed by powder X-ray diffraction (XRD). The powder XRD patterns of Na<sub>2</sub>SnSO<sub>4</sub>F<sub>2</sub> were carried out using a Bruker D2 PHASER X-ray diffractometer equipped with Cu K $\alpha$  radiation ( $\lambda = 1.5418 \text{ \AA}$ ). The  $2\theta$  range was 5-70°, the fixed counting time and scan step width were 1 s/step and 0.02 °, respectively. The diffraction patterns are in good agreement with the calculated ones (Figure 3b).

### **IR Spectroscopy**

The infrared spectroscopy testing instrument is Shimadzu IR Affinity-1 Fourier transform IR spectrometer with a wavenumber range of 400-4000 cm<sup>-1</sup> and a minimum resolution of 1 cm<sup>-1</sup>. The sample needs to be dried in advance, and then mixed evenly with potassium bromide KBr at a ratio of 1:100 by grinding, and pressed into a fixed specification disc for testing<sup>3</sup>.

### **UV-vis-NIR Diffuse Reflectance Spectroscopy**

The UV cutoff edge was obtained by diffuse reflectance test of solid powder. The instrument is Shimadzu SolidSpec-3700 DUV spectrophotometer, and the test wavelength range is 200-2600 nm.

### **Theoretical Calculations**

The electronic structure and optical properties of Na<sub>2</sub>SnSO<sub>4</sub>F<sub>2</sub> were calculated using the CASTEP software package.<sup>4</sup> The breaking energy by the plane wave interception is 850 eV, and the grid density at point k is set to 5×6×2. In the pseudopotential selection, the valence electron composition of Na<sub>2</sub>SnSO<sub>4</sub>F<sub>2</sub> is: Na-2p<sup>6</sup> 3s<sup>1</sup>, Sn-5s<sup>2</sup> 5p<sup>2</sup>, S-3s<sup>2</sup> 3p<sup>4</sup>, O-2s<sup>2</sup> 2p<sup>4</sup>, F-2s<sup>2</sup> 2p<sup>5</sup>. The real part of the dielectric function was determined

by using the Kramers-Kronig transformation<sup>5</sup>, and thus obtained the refractive index  $n$  and the birefringence  $\Delta n$  of  $\text{Na}_2\text{SnSO}_4\text{F}_2$ .

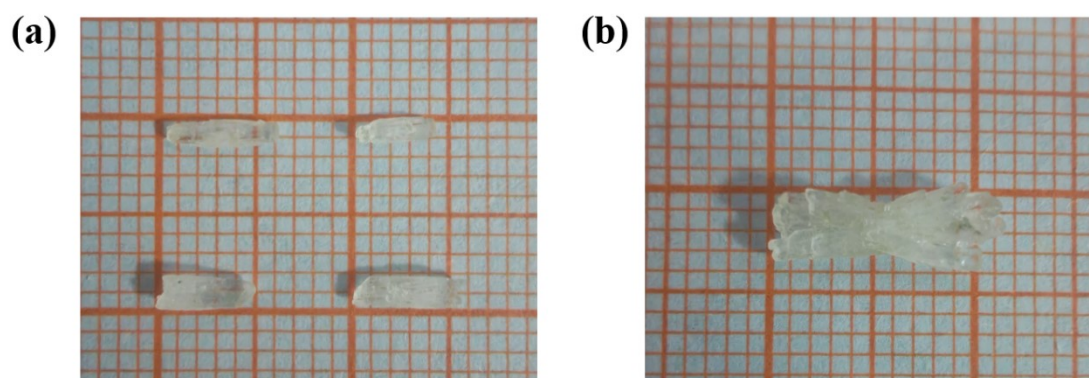

Figure S1. (a) Crystals of  $\text{Na}_2\text{SnSO}_4\text{F}_2$  (b) Polycrystalline  $\text{Na}_2\text{SnSO}_4\text{F}_2$

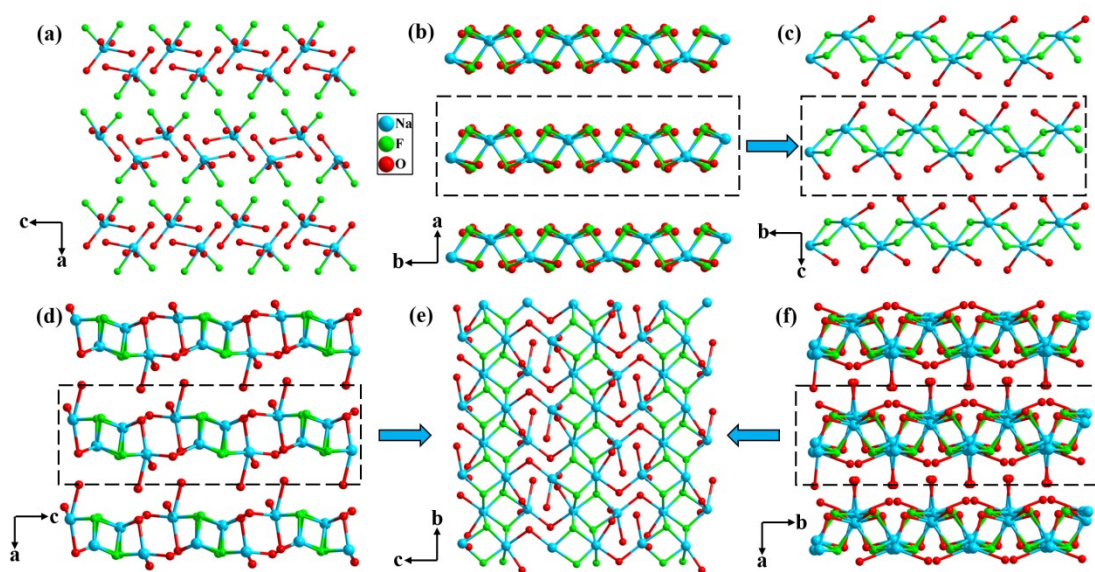

Figure S2. (a) Zero dimensional  $[\text{NaO}_4\text{F}_2]$ . (b, c) One-dimensional chains formed by  $[\text{NaO}_2\text{F}_4]$  are viewed along the  $c$  and  $a$  axes. (d, e, f) Two-dimensional layers formed by  $[\text{NaO}_4\text{F}_2]$  and  $[\text{NaO}_2\text{F}_4]$  are viewed along the  $b$ ,  $a$  and  $c$  axes.

Table S1. Crystal Data and Structure Refinement Details for Na<sub>2</sub>SnSO<sub>4</sub>F<sub>2</sub>.

|                                                                                                                                                                                                                                 |                                                                                                                                                                 |
|---------------------------------------------------------------------------------------------------------------------------------------------------------------------------------------------------------------------------------|-----------------------------------------------------------------------------------------------------------------------------------------------------------------|
| Empirical formula                                                                                                                                                                                                               | Na <sub>2</sub> SnSO <sub>4</sub> F <sub>2</sub>                                                                                                                |
| Formula weight                                                                                                                                                                                                                  | 298.73                                                                                                                                                          |
| Crystal system                                                                                                                                                                                                                  | Monoclinic                                                                                                                                                      |
| Space group                                                                                                                                                                                                                     | <i>P</i> 2 <sub>1</sub> / <i>c</i> (No.14)                                                                                                                      |
| Unit cell dimensions                                                                                                                                                                                                            | $a = 7.0381 \text{ \AA}$ , $\alpha = 90^\circ$<br>$b = 5.5378(12) \text{ \AA}$ , $\beta = 92.650(9)^\circ$<br>$c = 14.505(3) \text{ \AA}$ , $\gamma = 90^\circ$ |
| Volume                                                                                                                                                                                                                          | 564.7(2) Å <sup>3</sup>                                                                                                                                         |
| Z, Calculated density                                                                                                                                                                                                           | 4, 3.514 Mg/m <sup>3</sup>                                                                                                                                      |
| Absorption coefficient                                                                                                                                                                                                          | 5.034 mm <sup>-1</sup>                                                                                                                                          |
| <i>F</i> (000)                                                                                                                                                                                                                  | 552                                                                                                                                                             |
| Theta range for data collection                                                                                                                                                                                                 | 2.812 to 27.520°                                                                                                                                                |
| Limiting indices                                                                                                                                                                                                                | $-9 \leq h \leq 9$ , $-7 \leq k \leq 7$ , $-18 \leq l \leq 18$                                                                                                  |
| Reflections collected / unique                                                                                                                                                                                                  | 18036 / 1307 [ <i>R</i> (int) = 0.0684]                                                                                                                         |
| Completeness to theta = 27.485°                                                                                                                                                                                                 | 100.0 %                                                                                                                                                         |
| Refinement method                                                                                                                                                                                                               | Full-matrix least-squares on <i>F</i> <sup>2</sup>                                                                                                              |
| Data / restraints / parameters                                                                                                                                                                                                  | 1307 / 0 / 91                                                                                                                                                   |
| Goodness-of-fit on <i>F</i> <sup>2</sup>                                                                                                                                                                                        | 1.061                                                                                                                                                           |
| Final <i>R</i> indices [ <i>I</i> > 2sigma( <i>I</i> )] <sup>a</sup>                                                                                                                                                            | <i>R</i> <sub>1</sub> = 0.0202, <i>wR</i> <sub>2</sub> = 0.0495                                                                                                 |
| <i>R</i> indices (all data) <sup>a</sup>                                                                                                                                                                                        | <i>R</i> <sub>1</sub> = 0.0249, <i>wR</i> <sub>2</sub> = 0.0520                                                                                                 |
| Largest diff. peak and hole                                                                                                                                                                                                     | 0.869 and -0.654 e·Å <sup>-3</sup>                                                                                                                              |
| <sup>a</sup> <i>R</i> <sub>1</sub> = $\sum   F_o  -  F_c   / \sum  F_o $ and <i>wR</i> <sub>2</sub> = $[w(F_o^2 - F_c^2)^2 / wF_o^4]^{1/2}$ for <i>F</i> <sub>o</sub> <sup>2</sup> > 2σ ( <i>F</i> <sub>o</sub> <sup>2</sup> ). |                                                                                                                                                                 |

Table S2. Atomic coordinates and equivalent isotropic displacement parameters for  $\text{Na}_2\text{SnSO}_4\text{F}_2$ .  $U_{(\text{eq})}$  is defined as one third of the trace of the orthogonalized  $U_{ij}$  tensor.

| Atom | Wyck. | $x$     | $y$      | $z$     | $U_{\text{eq}} (\text{\AA}^2)$ | BVS |
|------|-------|---------|----------|---------|--------------------------------|-----|
| Na1  | e     | 1798(2) | 2204(2)  | 4308(1) | 27(1)                          | 1.0 |
| Na2  | e     | 876(2)  | 12550(2) | 1875(1) | 21(1)                          | 1.0 |
| Sn1  | e     | 4069(1) | 7344(1)  | 3264(1) | 19(1)                          | 1.9 |
| S1   | e     | 2868(1) | 7256(1)  | 5584(1) | 15(1)                          | 6.2 |
| O1   | e     | 1586(4) | 8948(4)  | 5986(2) | 50(1)                          | 1.9 |
| O2   | e     | 4737(4) | 7314(4)  | 6057(2) | 48(1)                          | 1.7 |
| O3   | e     | 2083(3) | 4814(3)  | 5591(1) | 29(1)                          | 1.9 |
| O4   | e     | 3046(5) | 8044(4)  | 4617(2) | 47(1)                          | 2.1 |
| F1   | e     | 1929(2) | 9798(3)  | 2955(1) | 22(1)                          | 1.1 |
| F2   | e     | 1818(2) | 5000(3)  | 3146(1) | 24(1)                          | 1.2 |

Table S3. Selected bond lengths (Å) and angles (deg) for Na<sub>2</sub>SnSO<sub>4</sub>F<sub>2</sub>.

|                       |        |                                          |        |
|-----------------------|--------|------------------------------------------|--------|
| Sn1-F1                | 2.0624 | F1-Na2-F2 <sup>i</sup>                   | 77.13  |
| Sn1-F2                | 2.0491 | F1-Na2-F2 <sup>iii</sup>                 | 81.07  |
| Sn1-O4                | 2.1562 | F1 <sup>iii</sup> -Na2-F2 <sup>i</sup>   | 79.70  |
| S1-O3                 | 1.4612 | F1 <sup>iii</sup> -Na2-F2 <sup>iii</sup> | 68.99  |
| S1-O4                 | 1.4812 | F1-Na2-O3 <sup>iv</sup>                  | 92.95  |
| S1-O2                 | 1.4553 | F1 <sup>iii</sup> -Na2-O3 <sup>iv</sup>  | 132.90 |
| S1-O1                 | 1.4422 | F1 <sup>iii</sup> -Na2-O1 <sup>v</sup>   | 79.94  |
| Na2-F1                | 2.2847 | F1-Na2-O1 <sup>v</sup>                   | 147.19 |
| Na2-F1 <sup>iii</sup> | 2.3562 | F2 <sup>i</sup> -Na2-F2 <sup>iii</sup>   | 123.37 |
| Na2-F2 <sup>iii</sup> | 2.3632 | F2 <sup>iii</sup> -Na2-O3 <sup>iv</sup>  | 88.69  |
| Na2-F2 <sup>i</sup>   | 2.3592 | F2 <sup>i</sup> -Na2-O3 <sup>iv</sup>    | 143.44 |
| Na2-O3 <sup>iv</sup>  | 2.4592 | F2 <sup>iii</sup> -Na2-O1 <sup>v</sup>   | 131.63 |
| Na2-O1 <sup>v</sup>   | 2.3942 | F2 <sup>i</sup> -Na2-O1 <sup>v</sup>     | 84.10  |
| Na1-F1 <sup>vi</sup>  | 2.3782 | O1 <sup>v</sup> -Na2-O3 <sup>iv</sup>    | 86.29  |
| Na1-F2                | 2.2902 | F1 <sup>vi</sup> -Na1-O4 <sup>vi</sup>   | 66.69  |
| Na1-O3                | 2.3582 | F1 <sup>vi</sup> -Na1-O2 <sup>vii</sup>  | 79.15  |
| Na1-O4 <sup>vi</sup>  | 2.4993 | F1 <sup>vi</sup> -Na1-O1 <sup>ii</sup>   | 77.74  |
| Na1-O2 <sup>vii</sup> | 2.5343 | F2-Na1-F1 <sup>vi</sup>                  | 76.66  |
| Na1-O1 <sup>ii</sup>  | 2.4833 | F2-Na1-O3                                | 99.42  |
| F1-Sn1-O4             | 78.92  | F2-Na1-O4 <sup>vi</sup>                  | 137.83 |
| F2-Sn1-F1             | 81.10  | F2-Na1-O2 <sup>vii</sup>                 | 74.68  |
| F2-Sn1-O4             | 84.29  | F2-Na1-O1 <sup>ii</sup>                  | 94.92  |
| O3-S1-O4              | 109.16 | O3-Na1-F1 <sup>vi</sup>                  | 171.93 |
| O2-S1-O3              | 110.54 | O3-Na1-O4 <sup>vi</sup>                  | 114.05 |
| O2-S1-O4              | 109.02 | O3-Na1-O2 <sup>vii</sup>                 | 93.05  |
| O1-S1-O3              | 110.79 | O3-Na1-O1 <sup>ii</sup>                  | 109.82 |
| O1-S1-O4              | 105.85 | O4 <sup>vi</sup> -Na1-O2 <sup>vii</sup>  | 78.50  |
| O1-S1-O2              | 111.34 | O1 <sup>ii</sup> -Na1-O4 <sup>vi</sup>   | 96.91  |



|                          |        |                                         |        |
|--------------------------|--------|-----------------------------------------|--------|
| F1-Na2-F1 <sup>iii</sup> | 121.84 | O1 <sup>ii</sup> -Na1-O2 <sup>vii</sup> | 156.32 |
|--------------------------|--------|-----------------------------------------|--------|

Symmetry codes: (i)x,y+1,z;(ii)-x,-y+1,-z+1; (iii)-x,y+1/2,-z+1/2; (iv)x,-y+3/2,z-1/2; (v)x,-y+5/2,z-1/2;(vi)x,y-1,z; (vii)-x+1,-y+1,-z+1.

## REFERENCES

- [1] Sheldrick, G. M. A short history of SHELX. *Acta Crystallogr., Sec. A: Found. Crystallogr.* **2008**, 64, 112–122.
- [2] Spek, A. L. Single-crystal structure validation with the program PLATON. *J. Appl. Crystallogr.* **2003**, 36, 7–13.
- [3] Ge Y. W.; Wang Q.; Yang F.; Huang L.; Gao D. J.; Bi J.; Zou G. H. Tin Chloride Sulfates  $A_3Sn_2(SO_4)_{3-x}Cl_{1+2x}$  (A=K, Rb, Cs; x=0, 1) as Multifunctional Optical Materials. *Inorg. Chem.* **2021**, 60, 8322–8330.
- [4] Clark, S. J.; Segall, M. D.; Pickard, C. J.; Hasnip, P. J.; Probert, M. J.; Refson, K.; Payne, M. C. First principles methods using CASTEP. *Z. Kristallogr. - Cryst. Mater.* **2005**, 220, 567–570.
- [5] Kang L.; Ramo D. M.; Lin Z. S.; Bristowe P. D.; Qin J. G.; Chen C. T. First principles selection and design of mid-IR nonlinear optical halide crystals. *J. Mater. Chem. C.* **2013**, 1, 7363–7370.
